# Supplementary material for: Seeing Inscriptions on the Shroud of Turin: The Role of Psychological Influences in the Perception of Writing
Source: PLOS journal article supplement (doi:10.1371/journal.pone.0136860), 2015-10-28
Supplement: S1 (10.1371/journal.pone.0136860.s001) [file journal.pone.0136860.s001]

| Participant   | <b>Condition 1</b>          |                      | <b>Condition 2</b>     |                      |
|---------------|-----------------------------|----------------------|------------------------|----------------------|
|               | <b>Religious Context</b>    |                      | <b>Neutral Context</b> |                      |
|               | <b>Religious</b>            | <b>Non-Religious</b> | <b>Religious</b>       | <b>Non-Religious</b> |
| 1             | 1 (God)                     | 0                    | 0                      | 0                    |
| 2             | 0                           | 0                    | 0                      | 0                    |
| 3             | 2 (Jesus, Bible)            | 0                    | 0                      | 1 (Reflex)           |
| 4             | 2 (Jesus, Cross)            | 2 (Walk, Cat)        | 0                      | 1 (Table)            |
| 5             | 0                           | 0                    | 0                      | 1 (Paper)            |
| 6             | 0                           | 0                    | 0                      | 1 (Leg)              |
| 7             | 2 (Holy, Temple)            | 0                    | 0                      | 0                    |
| 8             | 3 (Jesus, Christ, Crucifix) | 2 (Sing, Button)     | 0                      | 0                    |
| 9             | 1 (Prayer)                  | 3 (Home, Duck, To)   | 0                      | 0                    |
| 10            | 1 (Christ)                  | 0                    | 0                      | 0                    |
| 11            | 2 (Blessing, God)           | 0                    | 0                      | 0                    |
| 12            | 3 (Church, Jesus, Christ)   | 0                    | 0                      | 0                    |
| 13            | 2 (Demon, Holy)             | 0                    | 0                      | 0                    |
| 14            | 3 (Jesus, God, Sin)         | 0                    | 0                      | 0                    |
| 15            | 2 (Bible, Hell)             | 1 (Table)            | 0                      | 1 (Bus)              |
| 16            | 3 (Nazareth, God, Jew)      | 0                    | 0                      | 1 (Walk)             |
| <b>Totals</b> | <b>27</b>                   | <b>8</b>             | <b>0</b>               | <b>6</b>             |
